# Supplementary material for: T-Cell Responses to Immunodominant Listeria Epitopes Limit Vaccine-Directed Responses to the Colorectal Cancer Antigen, Guanylyl Cyclase C
Source: Frontiers journal article supplement (doi:10.3389/fimmu.2022.855759), 2022-03-09
Supplement: Data_Sheet_1.pdf [file Data_Sheet_1.pdf]

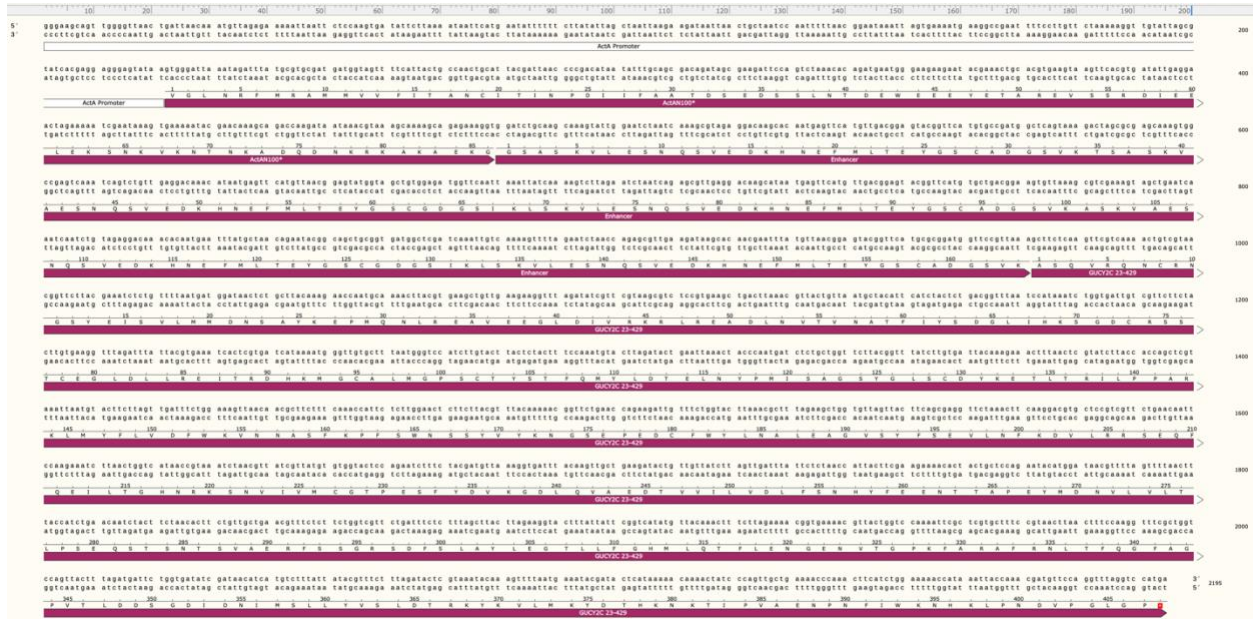

**Supplementary Figure 1. Sequence of Lm-GUCY2C.**

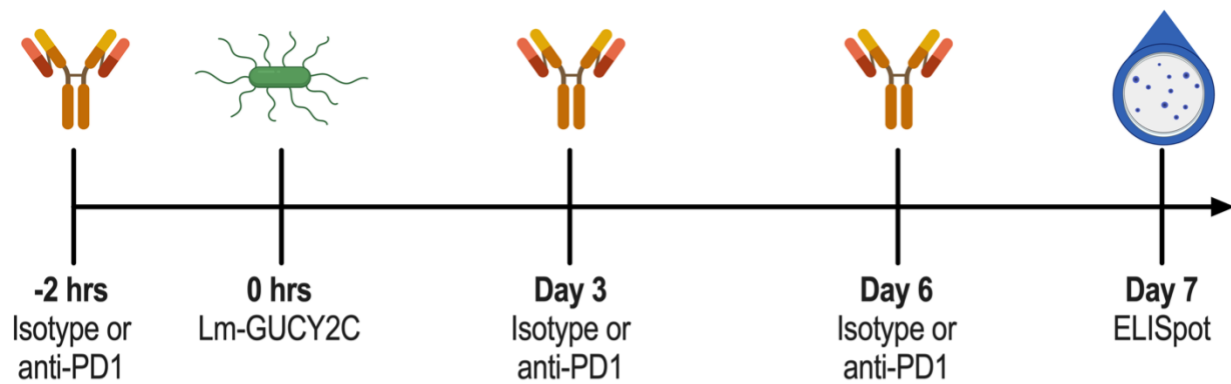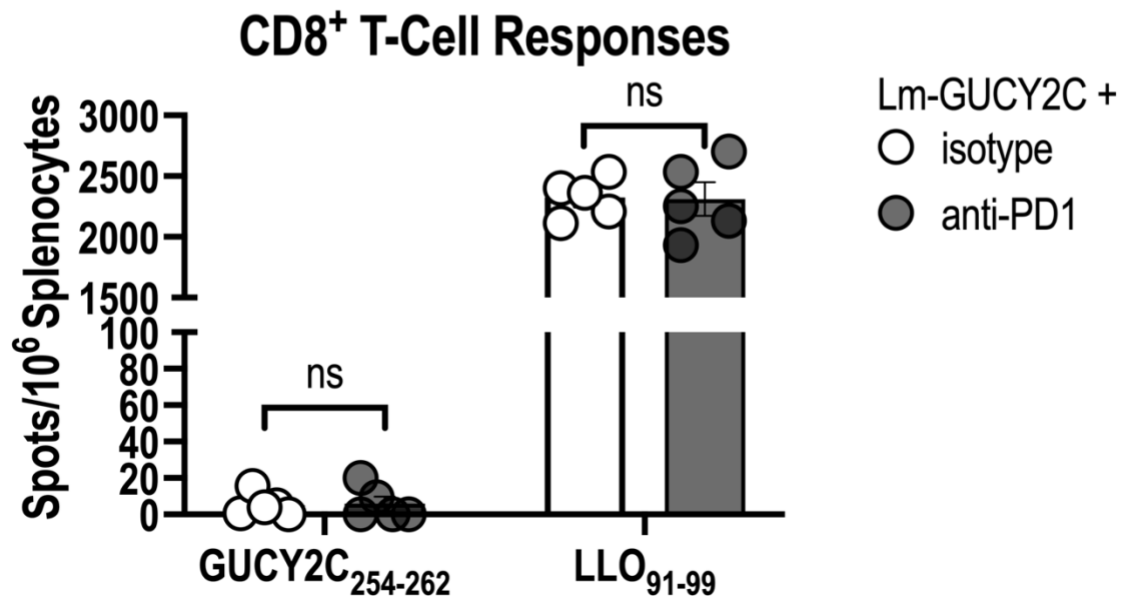

**Supplemental Figure 2. PD1 blockade does not reverse subdominance.** BALB/c mice (n=5/group) were treated i.p. with 100 ug of anti-PD1 antibody (InVivoMab, clone RMP1-14) or isotype control (InVivoMab clone 2A3) 2 h before i.p. vaccination with 10<sup>7</sup> CFU of Lm-GUCY2C. On days 3 and 6 after vaccination, mice received an additional 100 ug of antibody and on day 7 GUCY2C and LLO -specific CD8<sup>+</sup> T cells were quantified by IFN $\gamma$  ELISpot. Statistical comparisons employed two-way ANOVA with Bonferroni correction. Symbols indicate individual animals.
